# Supplementary material
Source: PubMed Central journal article supplement (PMC4589439)
Supplement: NIHMS690108-supplement-01.pdf [file NIHMS690108-supplement-01.pdf]

## Supplementary Materials

### 1. Supplementary Methods and Results

2. **Figure S1:** Genome wide association results for acute kidney injury from the discovery dataset (PEGASUS) are depicted by Manhattan (1A) and quantile-quantile (QQ) plots (1B).
3. **Figure S2:** Haplotype block structure of the *BBS9* gene using the HapMap CEU analysis panel. Increasing correlation ( $r^2$ ) between SNPs is reflected in increasing darker shading within each intersecting square. Correlations and block structure were estimated using HaploView 4.2. A 6kb LD block containing rs10262995 is located immediately 5' from a recombination hotspot.
4. **Figure S3:** Genotype clusters obtained from Illumina GenomeStudio for *rs13317787* in GRM7-LMCD1-AS1 intergenic region from two batches of genotype data (787 and 159 samples) for PEGASUS.
5. **Table S1:** Top-scoring directly genotyped and imputed SNPs in the *GRM7|LMCD1-AS1* Intergenic Region and in *BBS9*.

## Supplementary Methods and Results

### *Power Calculation:*

We used Quanto (Version 1.2.4) to assess the statistical power based on the genome wide significance level ( $p < 5 \times 10^{-8}$ ) and the characteristic of our dataset. Assuming the population mean and SD of  $\% \Delta Cr$  are 22.5 and 35.9, respectively as our discovery dataset, with a total sample size of 873, we will have 80% power to detect 4.4% of  $\% \Delta Cr$  variation ( $R_G^2$ ) explained by a genetic variant with MAF of 0.03 (e.g. rs13317787) or 0.09 (e.g. rs10262995). When

sample size reached 1253 as our total sample size, we will have 80% power to detect the proportion of  $\% \Delta Cr$  variation as small as 3.1% explained by a genetic variant with MAF of 0.03 or 0.09 as our top SNPs. The range of  $R_G^2$  presented in this power calculation is similar to what we have observed in the comparison of clinical and clinical-genomic models.

### ***BBS9 Gene - Structure and Known Functional Variation***

Bardet-Biedl syndrome 9 (*BBS9*) gene is located on chromosome 7p17 (33,168,856-33,645,680). It has 16 splice variants, with the longest transcript spanning 22 coding exons. Of a total of 16 variants within the *BBS9* gene predicted to have functional consequences, 10 have been directly associated with Bardet-Biedl syndrome<sup>1,2</sup>. None are represented on genotyping arrays nor are part of either 1000Genomes or HapMap datasets, thus precluding assessment of LD with the *BBS9* variants identified in this study. However, rs10262995 is part of a 6 kb LD block located immediately upstream (5') to a recombination hotspot in intron 20 (Figure S2). It should be noted that other *BBS9* variants were also identified using GWAS study design for cardiovascular and metabolic phenotypes in ambulatory populations (blood pressure, metabolic syndrome and cytokine responses)<sup>3-5</sup>, which may be of potential relevance to the development of AKI in cardiac surgical patients.

**Figure S1:** Genome wide association results for acute kidney injury from the discovery dataset (PEGASUS) are depicted by Manhattan (1A) and quantile-quantile (QQ) plots (1B).

A.

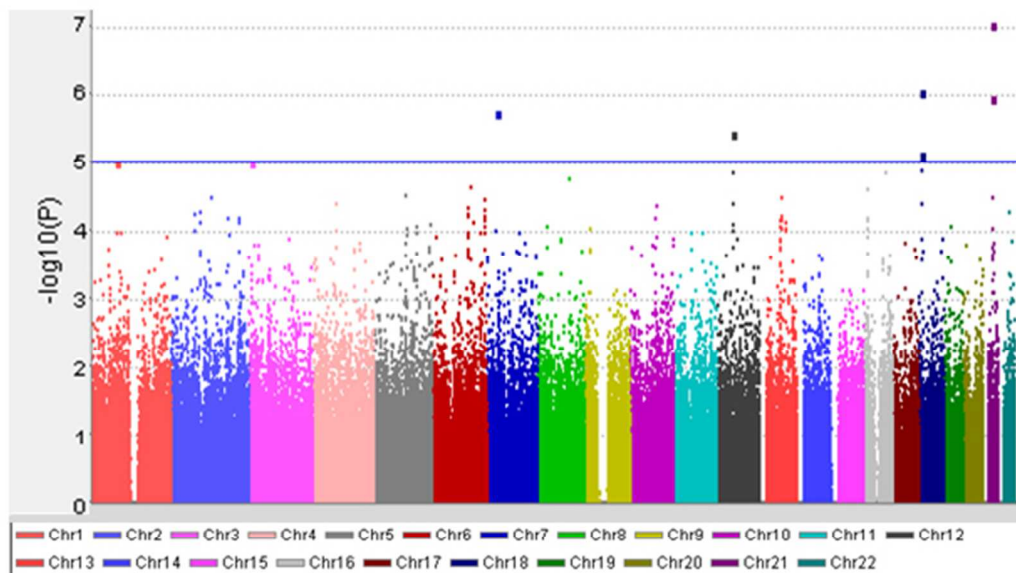

B.

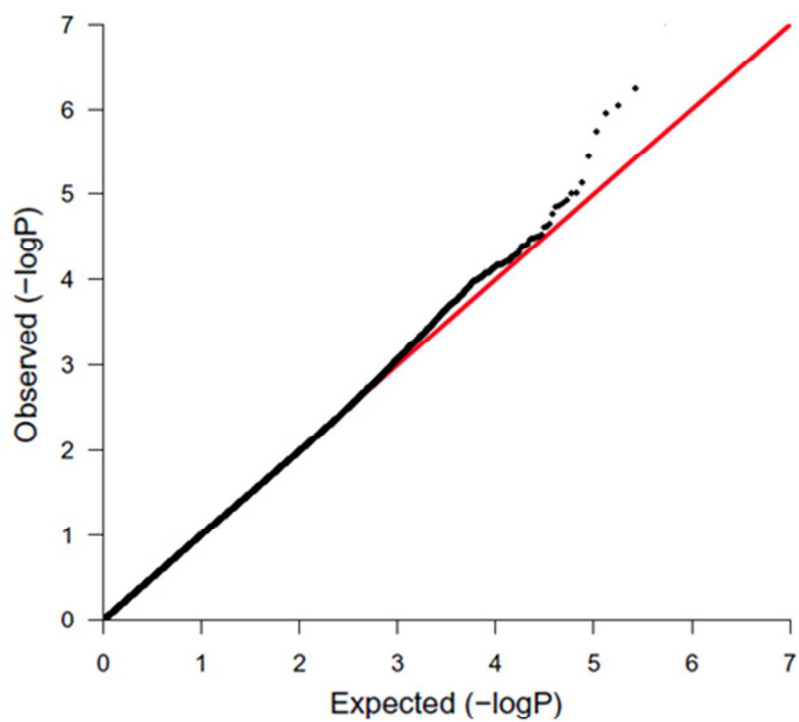

**Figure S2:** Haplotype block structure of the *BBS9* gene using the HapMap CEU analysis panel.

Increasing correlation ( $r^2$ ) between SNPs is reflected in increasing darker shading within each intersecting square. Correlations and block structure were estimated using HaploView 4.2. A 6kb LD block containing rs10262995 is located immediately 5' from a recombination hotspot.

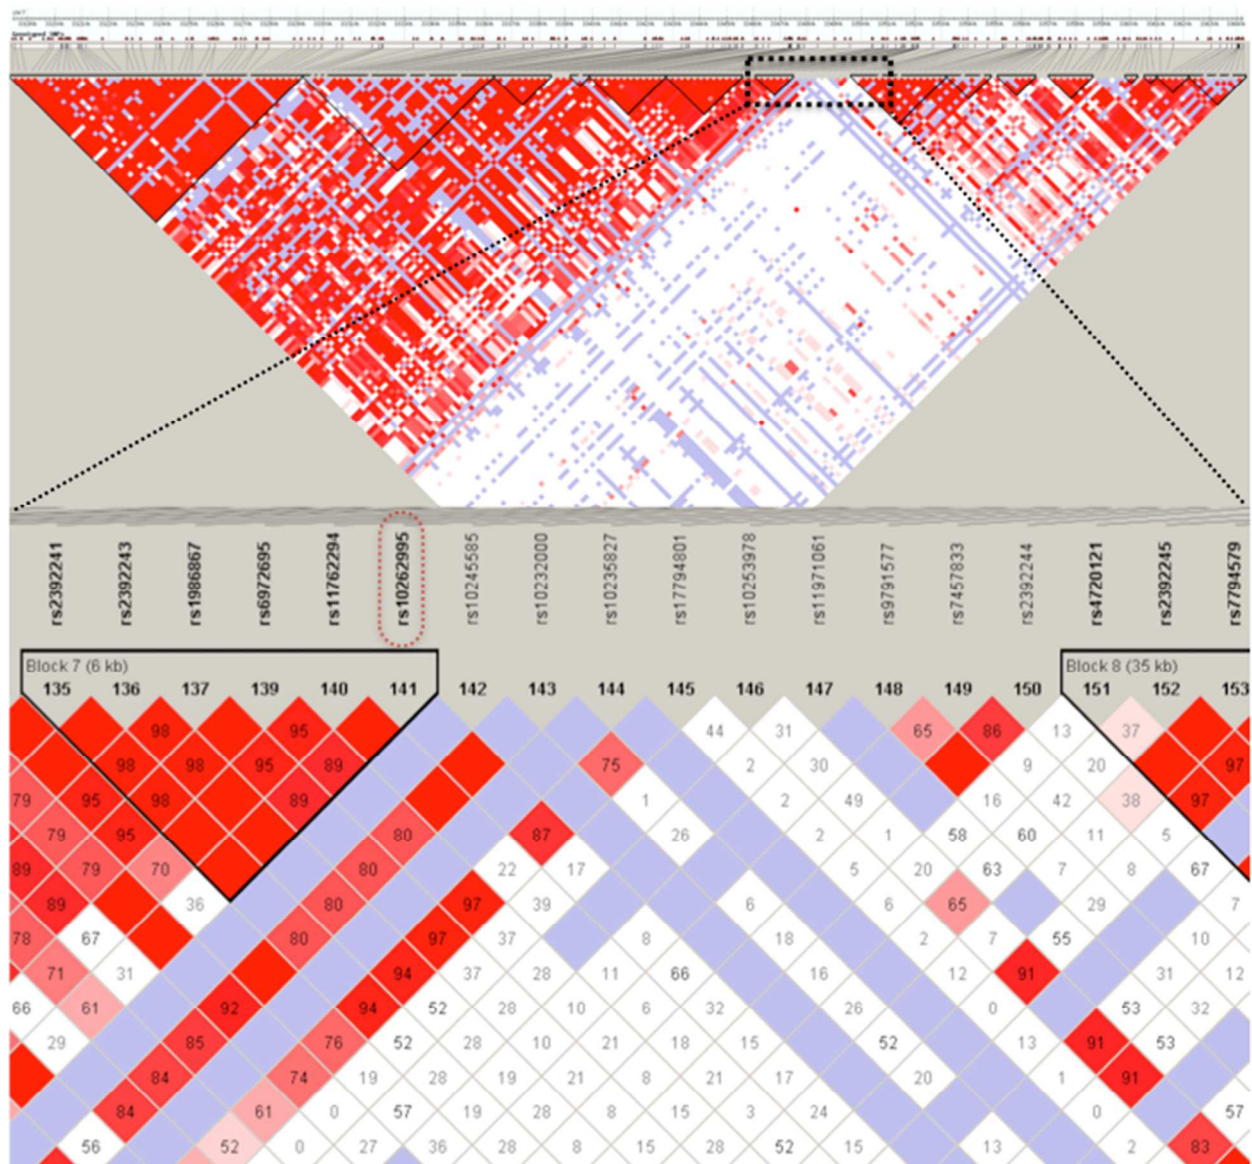

**Figure S3:** Genotype clusters obtained from Illumina GenomeStudio for rs13317787 in GRM7-LMCD1-AS1 intergenic region from two batches of genotype data (787 and 159 samples) for PEGASUS.

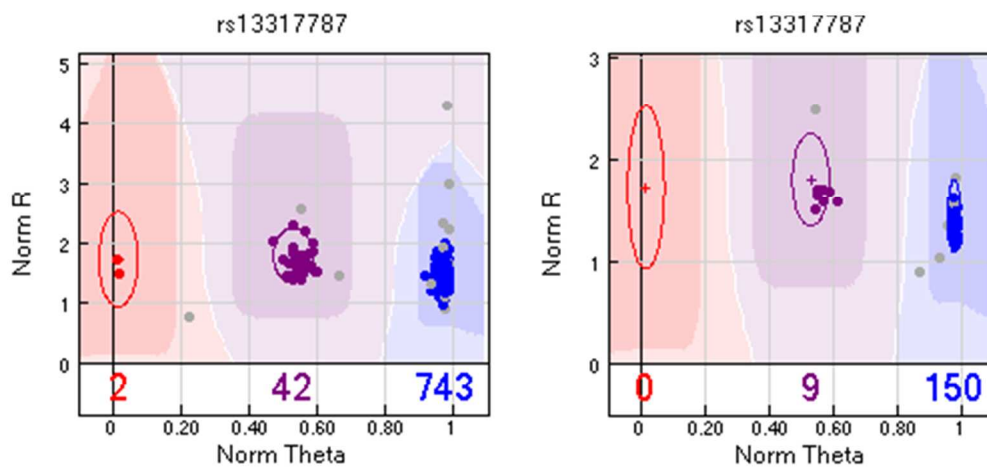

Table S1: Top-scoring directly genotyped and imputed SNPs in the *GRM7|LMCD1-AS1* Intergenic Region and in *BBS9*.

| Chr                                     | SNP         | Base Pair | Minor Allele | Discovery Cohort: PEGASUS |       |      |                                       | Replication Cohort: CATHGEN |       |       |                                      | Combined               |                 |
|-----------------------------------------|-------------|-----------|--------------|---------------------------|-------|------|---------------------------------------|-----------------------------|-------|-------|--------------------------------------|------------------------|-----------------|
|                                         |             |           |              | MAF                       | Beta  | SE   | p value                               | MAF                         | Beta  | SE    | p value                              | Meta-p                 | r <sup>2a</sup> |
| <u>GRM7 LMCD1-AS1 intergenic region</u> |             |           |              |                           |       |      |                                       |                             |       |       |                                      |                        |                 |
| 3                                       | rs511731    | 8099146   | A            | 0.02                      | 26.84 | 5.10 | 1.81x10 <sup>-7</sup>                 | 0.03                        | 14.87 | 7.34  | 0.043                                | 4.28x10 <sup>-8</sup>  | 0.74            |
| 3                                       | rs11131106  | 8099368   | C            | 0.02                      | 26.84 | 5.10 | 1.81x10 <sup>-7</sup>                 | 0.03                        | 14.87 | 7.34  | 0.043                                | 4.28x10 <sup>-8</sup>  | 0.74            |
| 3                                       | rs4566523   | 8099591   | A            | 0.02                      | 26.84 | 5.10 | 1.81x10 <sup>-7</sup>                 | 0.03                        | 14.87 | 7.34  | 0.043                                | 4.28x10 <sup>-8</sup>  | 0.74            |
| 3                                       | rs76087876  | 8100556   | A            | 0.02                      | 26.84 | 5.10 | 1.81x10 <sup>-7</sup>                 | 0.03                        | 14.87 | 7.34  | 0.043                                | 4.28x10 <sup>-8</sup>  | 0.74            |
| 3                                       | rs78993528  | 8100558   | G            | 0.02                      | 26.84 | 5.10 | 1.81x10 <sup>-7</sup>                 | 0.03                        | 14.87 | 7.34  | 0.043                                | 4.28x10 <sup>-8</sup>  | 0.74            |
| 3                                       | rs522639    | 8108291   | G            | 0.02                      | 26.72 | 5.16 | 2.85x10 <sup>-7</sup>                 | 0.03                        | 15.41 | 7.28  | 0.035                                | 5.06x10 <sup>-8</sup>  | 0.74            |
| 3                                       | rs484787    | 8109679   | A            | 0.02                      | 26.88 | 5.10 | 1.73x10 <sup>-7</sup>                 | 0.03                        | 14.87 | 7.34  | 0.043                                | 4.13x10 <sup>-8</sup>  | 0.74            |
| 3                                       | rs4277672   | 8113945   | C            | 0.03                      | 21.72 | 4.57 | 2.32x10 <sup>-6</sup>                 | 0.04                        | 10.50 | 6.89  | 0.128                                | 1.54x10 <sup>-6</sup>  | 0.62            |
| 3                                       | 3-8115655   | 8115655   | C            | 0.03                      | 21.70 | 4.57 | 2.4x10 <sup>-6</sup>                  | 0.04                        | 10.50 | 6.89  | 0.128                                | 1.58x10 <sup>-6</sup>  | 0.62            |
| 3                                       | 3-8115878   | 8115878   | T            | 0.03                      | 21.72 | 4.57 | 2.32x10 <sup>-6</sup>                 | 0.04                        | 10.50 | 6.89  | 0.128                                | 1.54x10 <sup>-6</sup>  | 0.62            |
| 3                                       | 3-8116001   | 8116001   | A            | 0.03                      | 22.17 | 4.63 | 1.94x10 <sup>-6</sup>                 | 0.04                        | 10.64 | 6.83  | 0.120                                | 1.28x10 <sup>-6</sup>  | 0.61            |
| 3                                       | rs115325749 | 8117103   | G            | 0.03                      | 21.72 | 4.57 | 2.32x10 <sup>-6</sup>                 | 0.04                        | 10.50 | 6.89  | 0.128                                | 1.54x10 <sup>-6</sup>  | 0.62            |
| 3                                       | rs116377711 | 8118197   | T            | 0.03                      | 21.72 | 4.57 | 2.32x10 <sup>-6</sup>                 | 0.04                        | 10.50 | 6.89  | 0.128                                | 1.54x10 <sup>-6</sup>  | 0.62            |
| 3                                       | 3-8118455   | 8118455   | T            | 0.03                      | 21.72 | 4.57 | 2.32x10 <sup>-6</sup>                 | 0.04                        | 10.50 | 6.89  | 0.128                                | 1.54x10 <sup>-6</sup>  | 0.62            |
| 3                                       | 3-8119772   | 8119772   | G            | 0.01                      | 33.70 | 6.18 | (4.07x10 <sup>-5</sup> ) <sup>b</sup> | 0.01                        | 45.34 | 11.49 | (1.7x10 <sup>-3</sup> ) <sup>b</sup> | 2.49x10 <sup>-11</sup> | Ref             |
| 3                                       | rs80134927  | 8120165   | A            | 0.03                      | 21.72 | 4.57 | 2.32x10 <sup>-6</sup>                 | 0.04                        | 10.50 | 6.89  | 0.128                                | 1.54x10 <sup>-6</sup>  | 0.62            |
| 3                                       | rs115902483 | 8120607   | A            | 0.03                      | 21.72 | 4.57 | 2.32x10 <sup>-6</sup>                 | 0.04                        | 10.50 | 6.89  | 0.128                                | 1.54x10 <sup>-6</sup>  | 0.62            |
| 3                                       | rs78603199  | 8120821   | A            | 0.03                      | 21.72 | 4.57 | 2.32x10 <sup>-6</sup>                 | 0.04                        | 10.50 | 6.89  | 0.128                                | 1.54x10 <sup>-6</sup>  | 0.62            |
| 3                                       | rs4387953   | 8120958   | C            | 0.03                      | 21.72 | 4.57 | 2.32x10 <sup>-6</sup>                 | 0.04                        | 10.50 | 6.89  | 0.128                                | 1.54x10 <sup>-6</sup>  | 0.62            |
| 3                                       | rs9820883   | 8122644   | G            | 0.03                      | 21.70 | 4.57 | 2.45x10 <sup>-6</sup>                 | 0.04                        | 10.50 | 6.89  | 0.128                                | 1.61x10 <sup>-6</sup>  | 0.62            |
| 3                                       | rs6797446   | 8125433   | A            | 0.03                      | 21.70 | 4.57 | 2.45x10 <sup>-6</sup>                 | 0.04                        | 10.50 | 6.89  | 0.128                                | 1.61x10 <sup>-6</sup>  | 0.62            |
| 3                                       | rs1607021   | 8129194   | G            | 0.03                      | 20.79 | 4.54 | 5.31x10 <sup>-6</sup>                 | 0.04                        | 10.48 | 6.88  | 0.128                                | 3.08x10 <sup>-6</sup>  | 0.60            |
| 3                                       | rs77820906  | 8130190   | T            | 0.03                      | 22.18 | 4.51 | 1.02x10 <sup>-6</sup>                 | 0.04                        | 9.06  | 7.02  | 0.197                                | 1.3x10 <sup>-6</sup>   | 0.57            |
| 3                                       | rs536793    | 8132902   | G            | 0.02                      | 24.55 | 5.14 | 2.06x10 <sup>-6</sup>                 | 0.01                        | 37.05 | 11.02 | 8.6x10 <sup>-4</sup>                 | 8.74x10 <sup>-9</sup>  | 0.77            |
| 3                                       | rs493271    | 8134937   | A            | 0.02                      | 24.57 | 5.13 | 2.0x10 <sup>-6</sup>                  | 0.02                        | 31.94 | 10.59 | 0.003                                | 1.88x10 <sup>-8</sup>  | 0.77            |
| 3                                       | rs9848276   | 8135200   | T            | 0.02                      | 23.43 | 5.09 | 4.74x10 <sup>-6</sup>                 | 0.02                        | 31.90 | 10.62 | 0.003                                | 5.04x10 <sup>-8</sup>  | 0.77            |
| 3                                       | rs576239    | 8135597   | A            | 0.02                      | 24.41 | 5.08 | 1.81x10 <sup>-6</sup>                 | 0.02                        | 31.94 | 10.59 | 0.003                                | 1.71x10 <sup>-8</sup>  | 0.77            |
| 3                                       | rs574408    | 8135797   | T            | 0.02                      | 24.38 | 5.08 | 1.82x10 <sup>-6</sup>                 | 0.02                        | 31.94 | 10.59 | 0.003                                | 1.75x10 <sup>-8</sup>  | 0.77            |
| 3                                       | rs548604    | 8136314   | A            | 0.03                      | 24.38 | 5.08 | 1.82x10 <sup>-6</sup>                 | 0.02                        | 31.94 | 10.59 | 0.003                                | 1.75x10 <sup>-8</sup>  | 0.77            |
| 3                                       | rs541878    | 8136712   | T            | 0.03                      | 24.38 | 5.08 | 1.82x10 <sup>-6</sup>                 | 0.02                        | 31.94 | 10.59 | 0.003                                | 1.75x10 <sup>-8</sup>  | 0.77            |
| 3                                       | rs79084800  | 8137685   | A            | 0.03                      | 24.38 | 5.08 | 1.82x10 <sup>-6</sup>                 | 0.02                        | 26.47 | 10.23 | 0.010                                | 4.94x10 <sup>-8</sup>  | 0.77            |

|                  |                         |          |   |      |       |      |                                      |      |       |       |                                      |                        |      |
|------------------|-------------------------|----------|---|------|-------|------|--------------------------------------|------|-------|-------|--------------------------------------|------------------------|------|
| 3                | rs1516371               | 8140289  | C | 0.03 | 23.24 | 5.03 | 4.47x10 <sup>-6</sup>                | 0.02 | 26.45 | 10.24 | 0.010                                | 1.26x10 <sup>-7</sup>  | 0.77 |
| 3                | rs75266354              | 8141109  | C | 0.03 | 24.36 | 5.07 | 1.85x10 <sup>-6</sup>                | 0.02 | 26.48 | 10.21 | 0.010                                | 4.92x10 <sup>-8</sup>  | 0.77 |
| 3                | rs10470631              | 8141586  | A | 0.03 | 23.24 | 5.03 | 4.47x10 <sup>-6</sup>                | 0.02 | 26.45 | 10.24 | 0.010                                | 1.26x10 <sup>-7</sup>  | 0.77 |
| 3                | rs13317787 <sup>c</sup> | 8141952  | A | 0.03 | 21.56 | 4.84 | 9.67x10 <sup>-6</sup>                | 0.02 | 22.04 | 9.56  | 0.022                                | 5.35x10 <sup>-7</sup>  | 0.72 |
| 3                | 3-8143673               | 8143673  | T | 0.03 | 23.67 | 5.03 | 2.92x10 <sup>-6</sup>                | 0.02 | 26.48 | 10.21 | 0.010                                | 7.88x10 <sup>-8</sup>  | 0.75 |
| 3                | rs73135229              | 8143742  | G | 0.03 | 23.56 | 5.04 | 3.45x10 <sup>-6</sup>                | 0.02 | 26.66 | 10.22 | 0.009                                | 9.06x10 <sup>-8</sup>  | 0.75 |
| 3                | rs9880757               | 8144012  | A | 0.03 | 22.00 | 4.90 | 7.94x10 <sup>-6</sup>                | 0.02 | 26.45 | 10.24 | 0.010                                | 2.37x10 <sup>-7</sup>  | 0.74 |
| 3                | rs9844587               | 8144234  | A | 0.03 | 21.73 | 4.85 | 8.45x10 <sup>-6</sup>                | 0.02 | 26.45 | 10.24 | 0.010                                | 2.55x10 <sup>-7</sup>  | 0.72 |
| 3                | rs11925840              | 8144902  | T | 0.03 | 21.62 | 4.85 | 9.51x10 <sup>-6</sup>                | 0.02 | 26.45 | 10.24 | 0.010                                | 2.87x10 <sup>-7</sup>  | 0.70 |
| 3                | rs2171523               | 8148053  | A | 0.03 | 21.15 | 4.73 | 8.71x10 <sup>-6</sup>                | 0.02 | 24.81 | 9.85  | 0.012                                | 3.01x10 <sup>-7</sup>  | 0.65 |
| 3                | rs577364                | 8149000  | A | 0.03 | 20.93 | 4.69 | 9.3x10 <sup>-6</sup>                 | 0.02 | 22.38 | 9.55  | 0.020                                | 4.77x10 <sup>-7</sup>  | 0.64 |
| 3                | rs1488349               | 8153260  | T | 0.02 | 29.71 | 6.17 | 1.76x10 <sup>-6</sup>                |      |       |       | 3.14x10 <sup>-5</sup>                |                        |      |
| 3                | rs1825891               | 8161987  | T | 0.02 | 27.96 | 5.70 | (1.1x10 <sup>-4</sup> ) <sup>b</sup> | 0.01 | 50.66 | 12.02 | (8.1x10 <sup>-4</sup> ) <sup>b</sup> | 5.41x10 <sup>-10</sup> | 0.97 |
| 3                | rs1825891               | 8161987  | T | 0.02 | 27.96 | 5.70 | 1.12x10 <sup>-6</sup>                | 0.02 | 26.58 | 9.96  | 0.008                                | 2.38x10 <sup>-8</sup>  | 0.72 |
| 3                | rs320069                | 8199895  | G | 0.03 | 20.82 | 4.57 | 5.99x10 <sup>-6</sup>                | 0.03 | 11.63 | 8.37  | 0.166                                | 3.09x10 <sup>-6</sup>  | 0.41 |
| <b>BBS9 gene</b> |                         |          |   |      |       |      |                                      |      |       |       |                                      |                        |      |
| 7                | rs28619003              | 33548225 | T | 0.08 | 15.58 | 3.05 | 3.92x10 <sup>-7</sup>                | 0.10 | 9.42  | 4.53  | 0.038                                | 6.51x10 <sup>-8</sup>  | Ref  |
| 7                | rs10262995 <sup>c</sup> | 33550041 | A | 0.09 | 14.33 | 2.98 | 1.83x10 <sup>-6</sup>                | 0.10 | 9.51  | 4.47  | 0.034                                | 2.24x10 <sup>-7</sup>  | 1.00 |

**Abbreviations:** SNP - single nucleotide polymorphism; Chr – chromosome; MAF – minor allele frequency; Beta – regression coefficient SE – standard error; PEGASUS, CATHGEN – see text.

<sup>a</sup>r<sup>2</sup> was compared for each SNP relative to the “Ref” (best performing) SNP.

<sup>b</sup>p-values in parenthesis are from permutation with 10<sup>6</sup> repeats.

<sup>c</sup>Genotyped SNPs initially identified in GWAS and replication dataset are in red font.





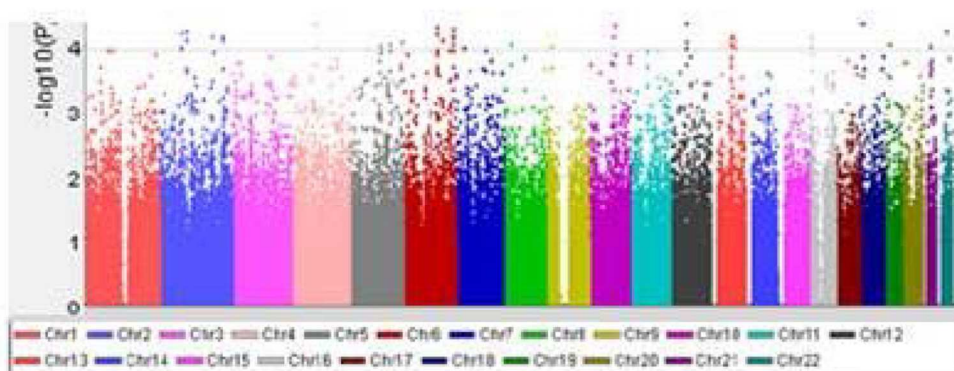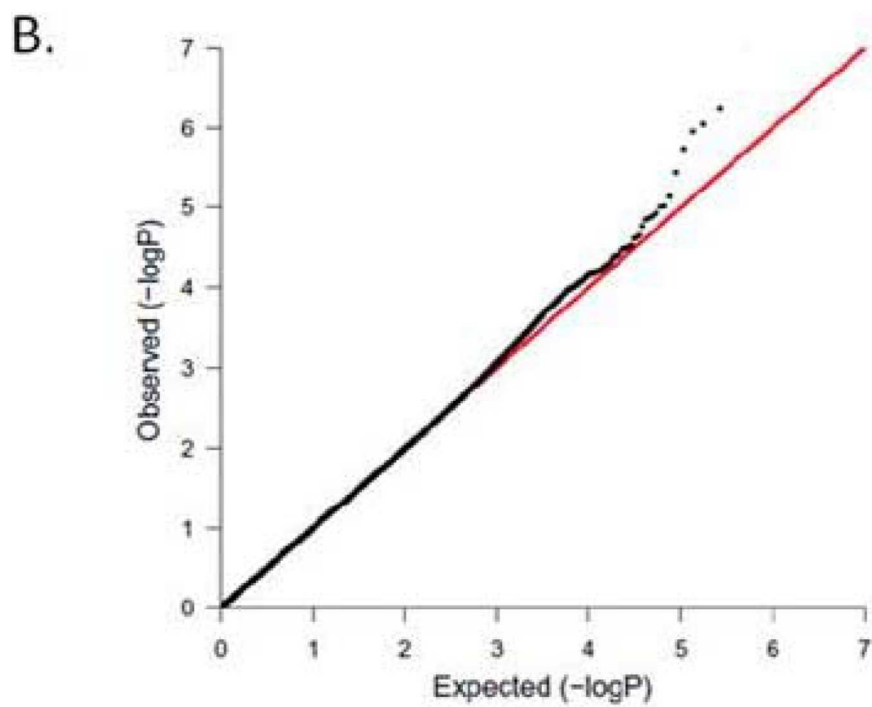

118x135mm (300 x 300 DPI)

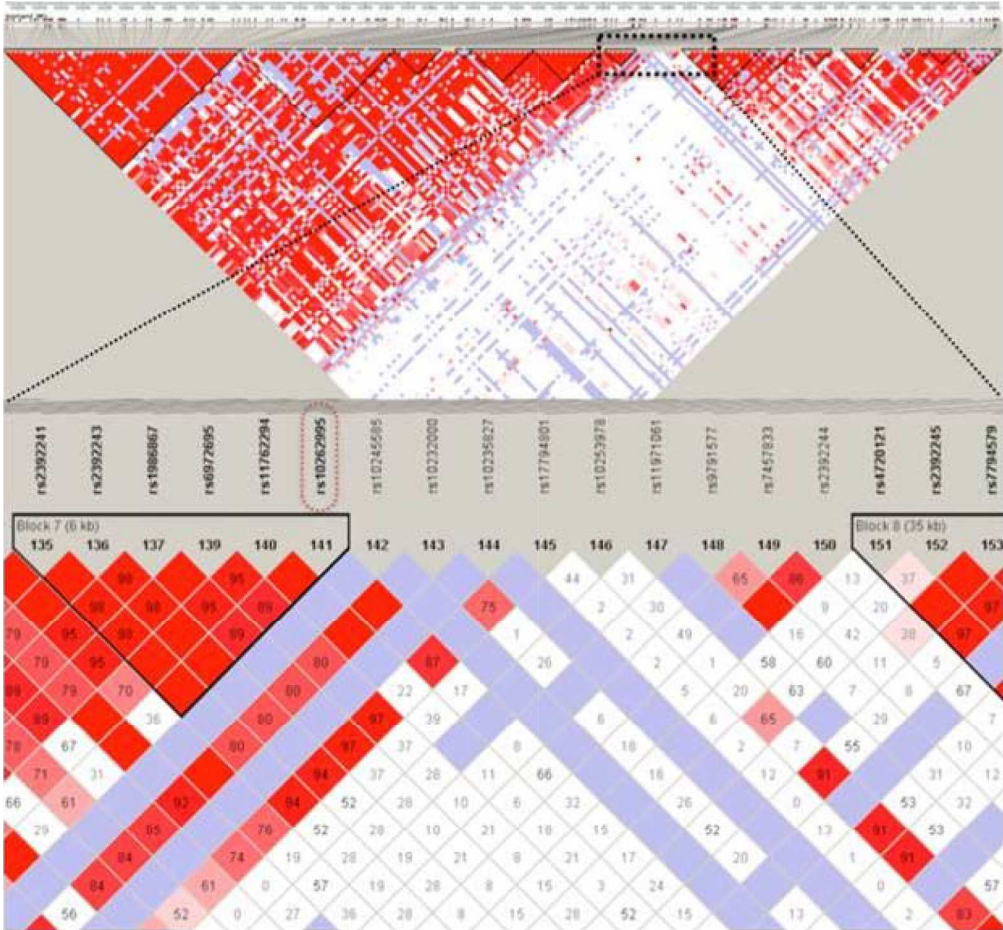

180x167mm (300 x 300 DPI)

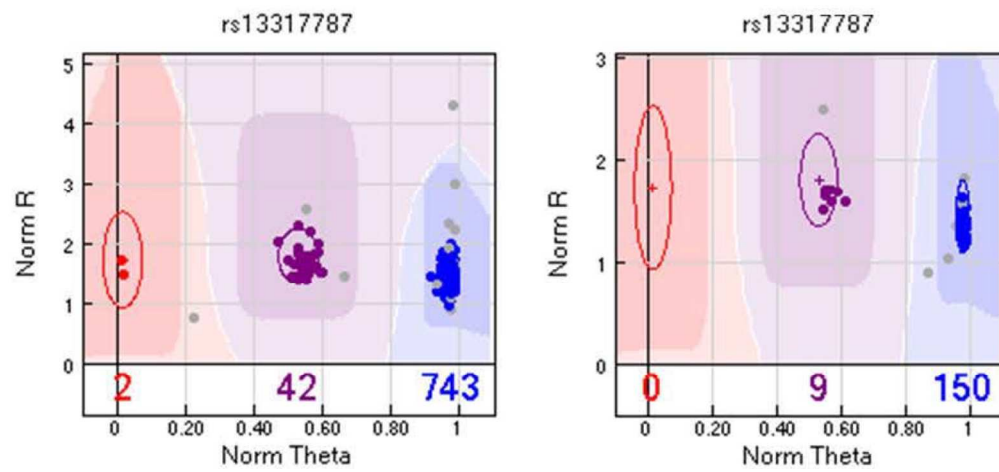

131x61mm (300 x 300 DPI)
